# Supplementary material for: Acid hydrolysis of chitin in calcium chloride solutions
Source: Royal Society of Chemistry journal article supplement (doi:10.1039/d2gc04246k), 2023-01-01
Supplement: d2gc04246k1.pdf [file d2gc04246k1.pdf]

## Support information

### Acid Hydrolysis of Chitin in Calcium Chloride Solutions

Yudi Wang,<sup>a</sup> Jia Kou,<sup>a</sup> Xuwei Wang<sup>a</sup> and Xi Chen<sup>\*a</sup>

*China-UK Low Carbon College, Shanghai Jiao Tong University, 3 Yinlian Rd, 201306, Shanghai, China.*

\*E-mail: [chenxi-lcc@sjtu.edu.cn](mailto:chenxi-lcc@sjtu.edu.cn).

#### **Table of Contents**

Number of pages in the supporting information: 24

Number of figures in the supporting information: 18

Number of tables in the supporting information: 11

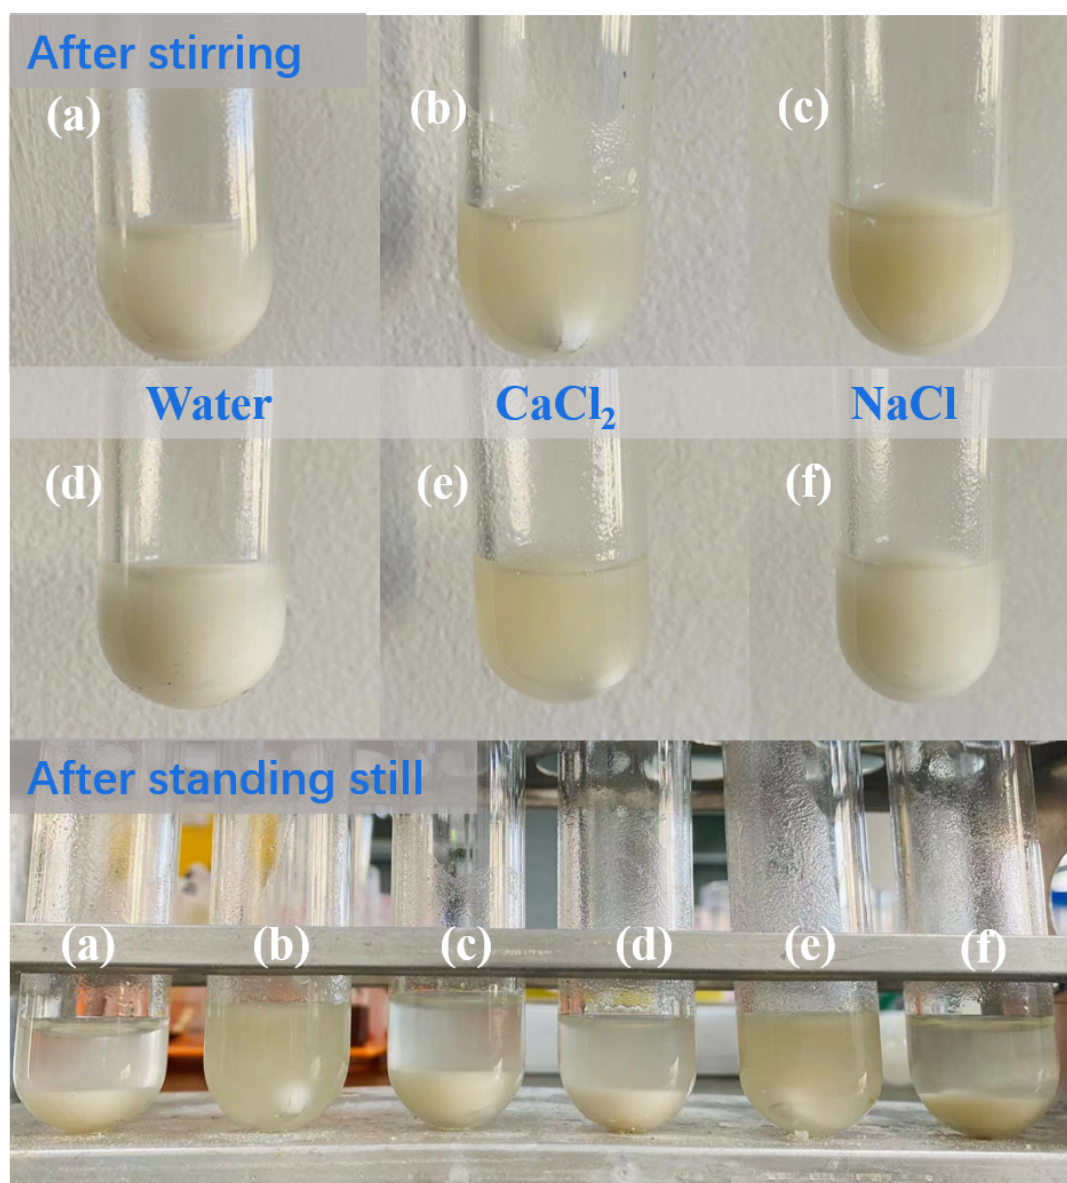

Fig. S1 Chitin samples in different solvent systems after stirring and after standing still: chitin with aging in (a) water (b) CaCl<sub>2</sub> (c) NaCl; chitin without aging in (d) water (e) CaCl<sub>2</sub> (f) NaCl. (The concentrations of CaCl<sub>2</sub> solution and NaCl solution are 50 wt% and 30 wt%, respectively.)

Table S1 Yields of by-products from NAG or chitin under different aging and hydrolysis conditions

| Entry | Substrate | Aging temperature (K) | C/A ratio | Hydrolysis temperature (K) | NAG yield/conversion <sup>a</sup> (%) | By-products yield (%) |             |                |             |             |       |
|-------|-----------|-----------------------|-----------|----------------------------|---------------------------------------|-----------------------|-------------|----------------|-------------|-------------|-------|
|       |           |                       |           |                            |                                       | 5-HMF                 | Formic acid | Levulinic acid | Acetic acid | Lactic acid | 3A5AF |
| 1     | chitin    | 313                   | 8:1       | 393                        | 51.0                                  | 0.6                   | 0.1         | 1.1            | 0.4         | 2.8         | 0.3   |
| 2     | chitin    | -                     | 8:1       | 393                        | 5.91                                  | 0.8                   | 0           | 0              | 0.3         | 1.3         | 0.2   |
| 3     | chitin    | -                     | 4:1       | 393                        | 6.33                                  | 0.8                   | 0.0         | 0.6            | 0.5         | 1.8         | 0.2   |
| 4     | chitin    | 318                   | 8:1       | 393                        | 37.2                                  | 0.5                   | 0           | -              | 0.2         | 0           | 0.3   |
| 5     | chitin    | 328                   | 8:1       | 393                        | 32.3                                  | 0.8                   | 0.1         | -              | 0.5         | 3.0         | 0.3   |
| 6     | chitin    | 313                   | 8:1       | 403                        | 28.1                                  | 1.1                   | 0.1         | 3.7            | 0.6         | 3.5         | 0.3   |
| 7     | NAG       | 313                   | 8:1       | 403                        | 51.6                                  | 0.8                   | 0           | 1.8            | 0.2         | 1.8         | 0.2   |
| 8     | NAG       | 313                   | 8:1       | 393                        | 55.7                                  | 0.9                   | 0           | 2.0            | 0.2         | 1.8         | 0.2   |

<sup>a</sup> Entry 7 and Entry 8 show NAG conversion instead of yield.

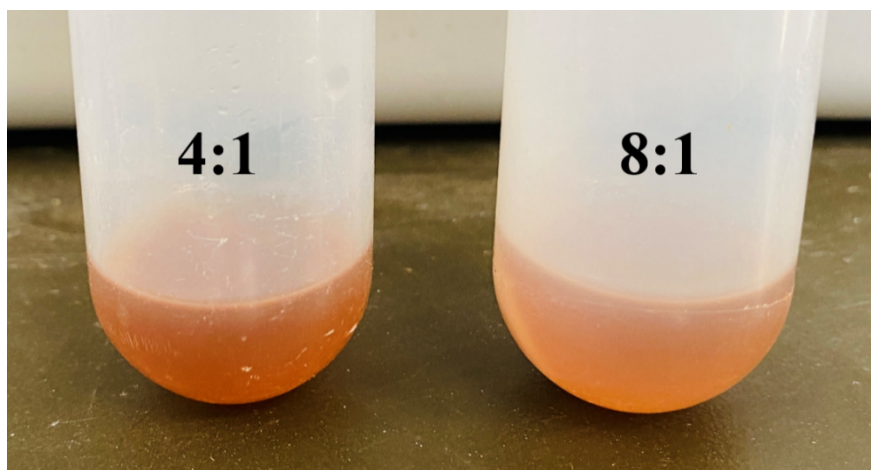

Fig. S2 Colour of hydrolysis products at acid concentrations of 4:1 and 8:1. (Samples were aged for 48 h at 313 K and hydrolysed at 393 K for 60 min.)

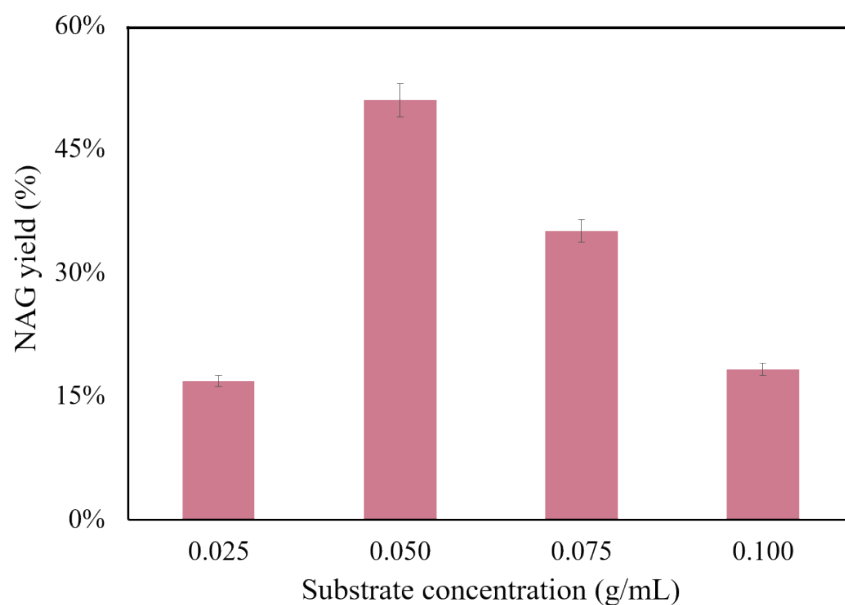

Fig. S3 NAG yield under different substrate concentration. Reaction conditions: chitin was aged at 313 K for 48 h (C/A ratio as 8:1) and hydrolyzed in 50 wt%  $\text{CaCl}_2$  at 393 K for 1 h.

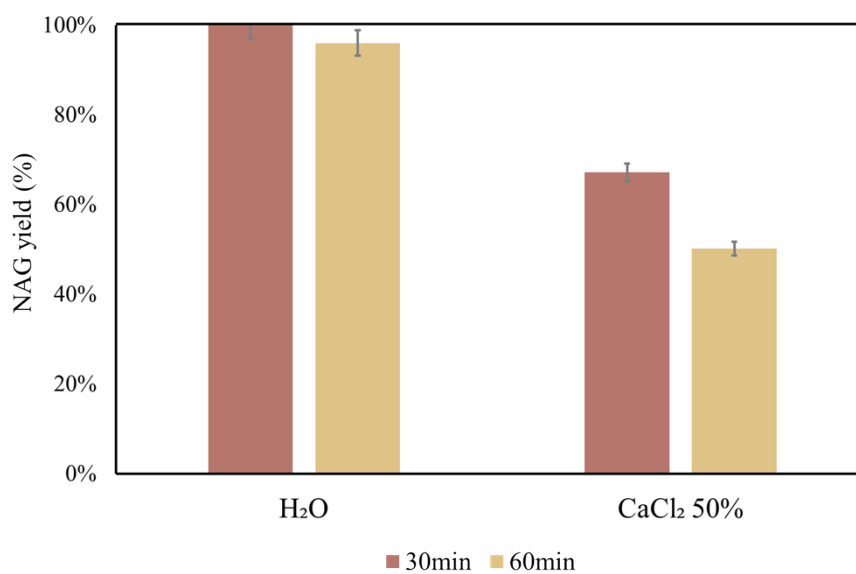

Fig. S4 NAG decomposition tests in water and 50 wt%  $\text{CaCl}_2$  solution. Reaction conditions: 0.2 g NAG in 4 mL solvent, heated at 393 K for 1 h.

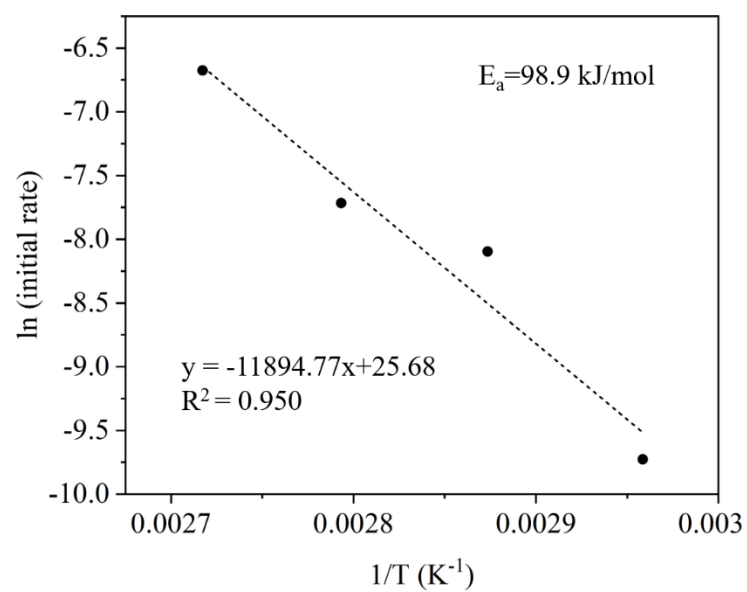

Fig. S5 Arrhenius plot of initial rates based on NAG concentration at 338 K-368 K for 20-70 min.

Table S2 The detailed results of NAG concentration with respect to time at various temperatures for the Arrhenius plot (chitin conversion is lower than 30 wt%).

| Temperature (K) | Time (min) | NAG concentration<br>(mol/L) | slope    | ln (slope) |
|-----------------|------------|------------------------------|----------|------------|
| 338             | 35         | 4.46E-03                     | 2.96E-03 | -9.726     |
|                 | 50         | 4.73E-03                     |          |            |
|                 | 65         | 5.83E-03                     |          |            |
|                 | 70         | 6.14E-03                     |          |            |
| 348             | 40         | 7.05E-03                     | 2.87E-03 | -8.097     |
|                 | 50         | 1.10E-02                     |          |            |
|                 | 60         | 1.24E-02                     |          |            |
|                 | 70         | 1.68E-02                     |          |            |
| 358             | 30         | 8.13E-03                     | 2.79E-03 | -7.716     |
|                 | 40         | 2.69E-02                     |          |            |
|                 | 50         | 3.85E-02                     |          |            |
|                 | 70         | 5.69E-02                     |          |            |
| 368             | 20         | 8.13E-03                     | 2.72E-03 | -6.676     |
|                 | 30         | 2.69E-02                     |          |            |
|                 | 50         | 3.85E-02                     |          |            |
|                 | 60         | 5.69E-02                     |          |            |

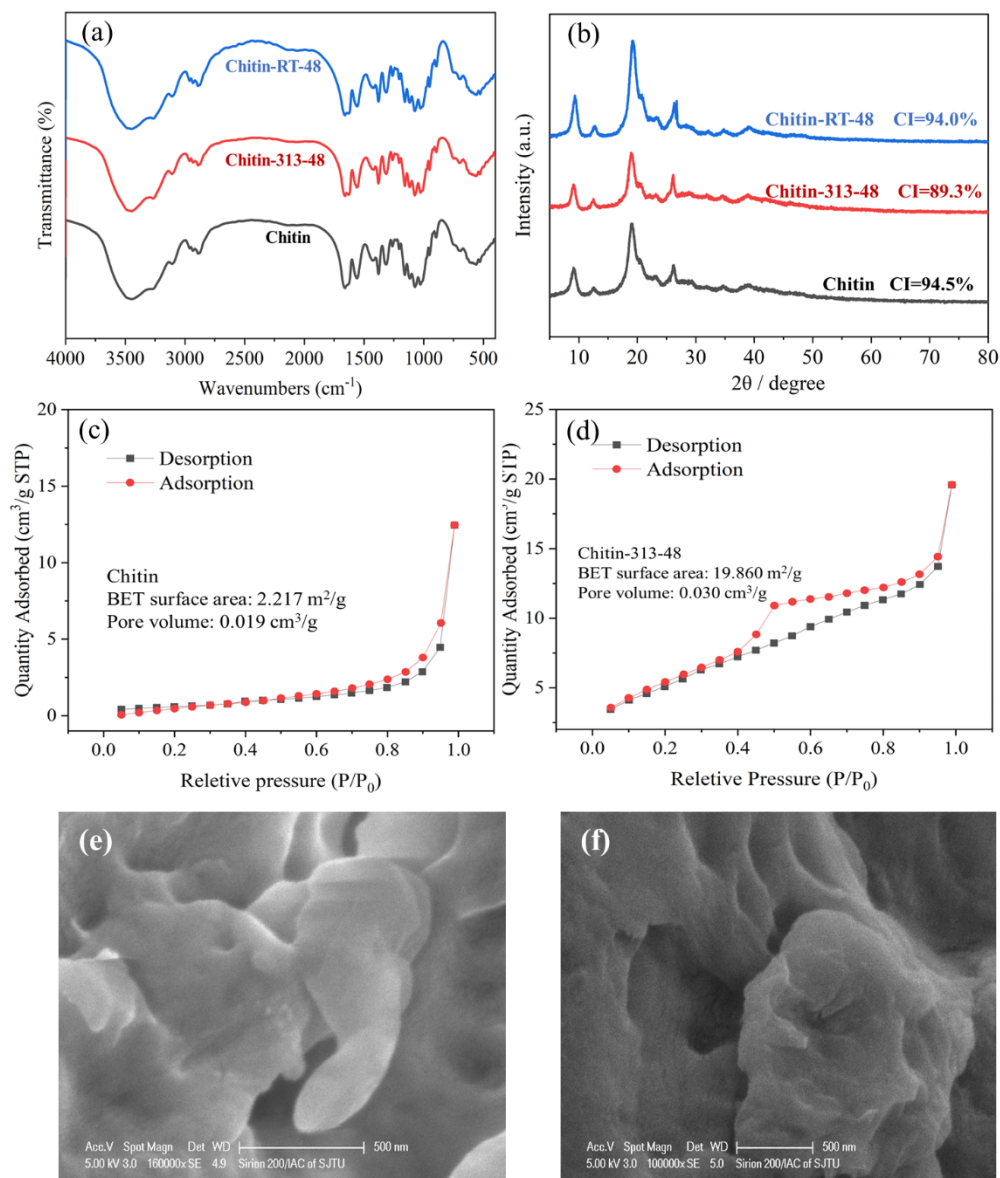

Fig. S6 (a) FTIR of chitin, chitin-313-48, chitin-RT-48; (b) XRD of chitin, chitin-313-48, chitin-RT-48; BET of (c) chitin; (d) chitin-313-48; SEM of (e) chitin; (f) chitin-313-48.

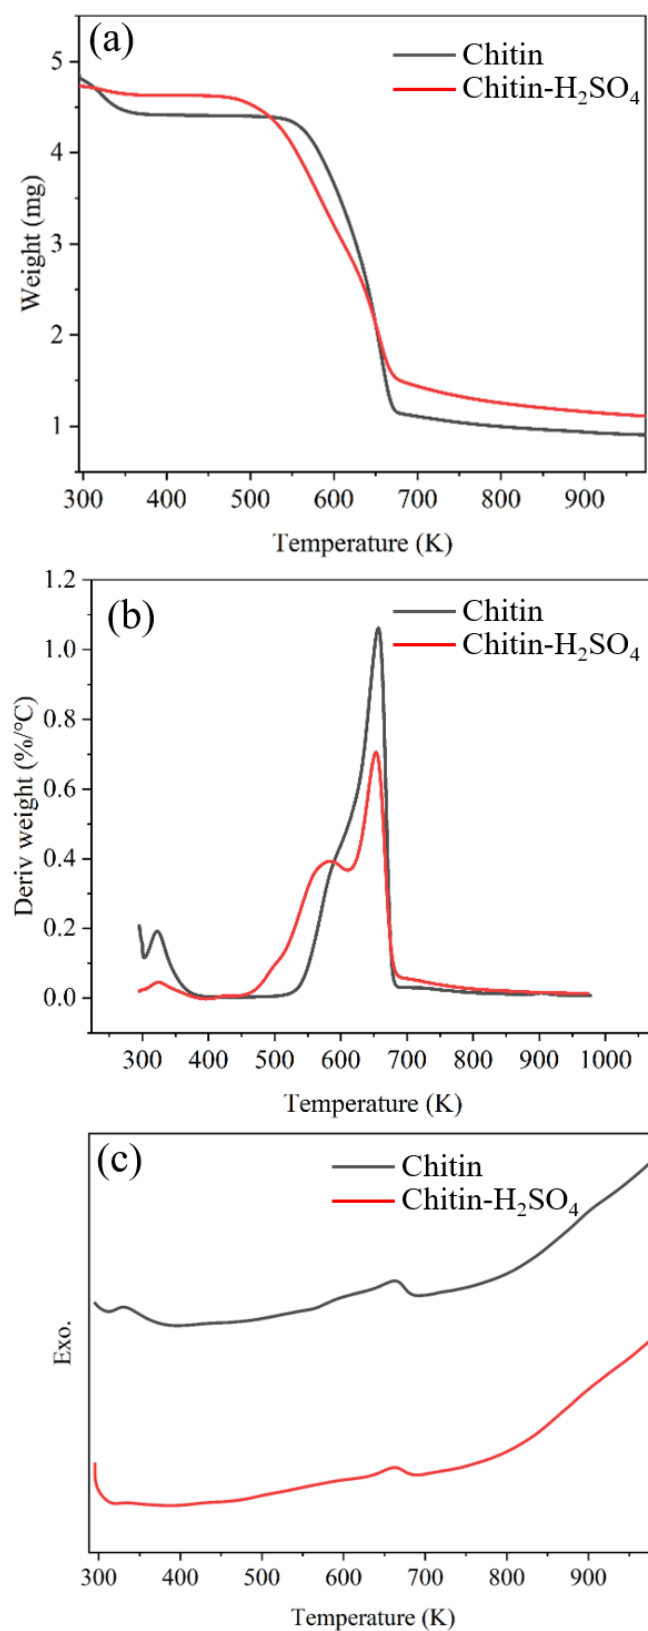

Fig. S7 (a) TGA, (b) DTG and (c) DSC of chitin and Chitin- $\text{H}_2\text{SO}_4$ .

Table S3 Solubility of chitin under different aging conditions.

| Samples       | Aging temperature (K) | Aging time (h) | Chitin to acid molar ratio | Additive                    | Solubility (%) |
|---------------|-----------------------|----------------|----------------------------|-----------------------------|----------------|
| Chitin        | -                     | -              | -                          | -                           | 0              |
| Chitin-RT-24  | RT                    | 24             | 10:1                       | -                           | 14.9           |
| Chitin-RT-24  | RT                    | 24             | 8:1                        | -                           | 19.2           |
| Chitin-RT-24  | RT                    | 24             | 6:1                        | -                           | 21.5           |
| Chitin-RT-24  | RT                    | 24             | 4:1                        | -                           | 22.8           |
| Chitin-313-48 | 313                   | 48             | 8:1                        | -                           | 20.8           |
| Chitin-313-48 | 313                   | 48             | 8:1                        | 10 $\mu$ L H <sub>2</sub> O | 19.4           |
| Chitin-313-48 | 313                   | 48             | 8:1                        | 20 $\mu$ L H <sub>2</sub> O | 21.9           |
| Chitin-313-48 | 313                   | 48             | 8:1                        | 60 $\mu$ L H <sub>2</sub> O | 23.1           |
| Chitin-313-48 | 313                   | 48             | 8:1                        | 80 $\mu$ L H <sub>2</sub> O | 26.3           |

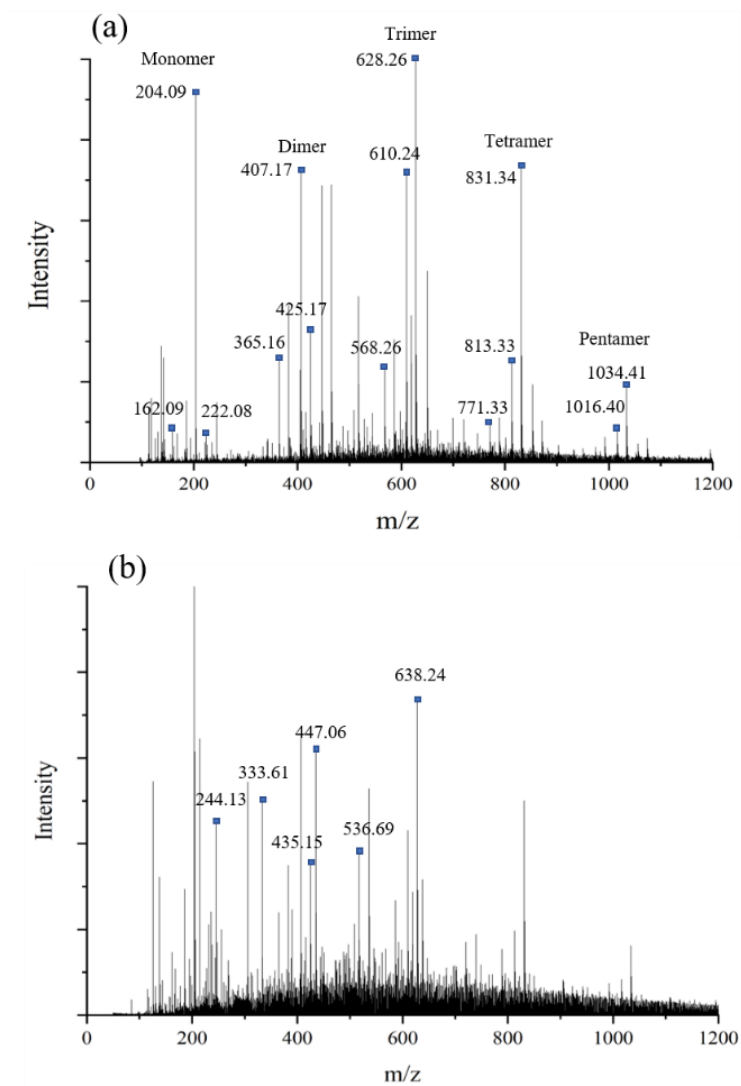

Fig. S8 TOF-MS of (a) chitin-313-48 (b) chitin-313-48 with 30%  $\text{CaCl}_2$  MSHs.

Table S4 The detailed peak locations of chitin-313-48 and chitin-313-48-CaCl<sub>2</sub> dissolved portion in TOF-MS.

| Sample           | Location<br>(m/z) | Formula                                  | Comment                     |
|------------------|-------------------|------------------------------------------|-----------------------------|
| Chitin-313-48    | 204.09            | $C_8H_{13}NO_5H$                         | Monomer                     |
|                  | 222.08            | $C_8H_{14}NO_5 \cdot H_2O$               |                             |
|                  | 407.17            | $(C_8H_{13}NO_5)_2H$                     | Dimer                       |
|                  | 425.17            | $(C_8H_{13}NO_5)_2H \cdot H_2O$          |                             |
|                  | 610.24            | $(C_8H_{13}NO_5)_3H$                     | Trimer                      |
|                  | 628.26            | $(C_8H_{13}NO_5)_3H \cdot H_2O$          |                             |
|                  | 813.33            | $(C_8H_{13}NO_5)_4H$                     | Tetramer                    |
|                  | 831.34            | $(C_8H_{13}NO_5)_4H \cdot H_2O$          |                             |
|                  | 1016.40           | $(C_8H_{13}NO_5)_5H$                     | Pentamer                    |
|                  | 1034.41           | $(C_8H_{13}NO_5)_5H \cdot H_2O$          |                             |
| Chitin-313-48-Ca | 162.09            | $C_6H_{11}NO_4$                          | Glucosamine                 |
|                  | 365.16            | $C_6H_{11}NO_4 \cdot C_8H_{13}NO_5H$     | Glucosamine<br>+ Monomer    |
|                  | 568.26            | $C_6H_{11}NO_4 \cdot (C_8H_{13}NO_5)_2H$ | Glucosamine +<br>Dimer      |
|                  | 771.33            | $C_6H_{11}NO_4 \cdot (C_8H_{13}NO_5)_3H$ | Glucosamine +<br>Trimer     |
|                  |                   |                                          |                             |
| Chitin-313-48-Ca | 244.13            | $C_8H_{13}NO_5HCa$                       | Monomer + Ca <sup>2+</sup>  |
|                  | 333.61            | $(C_8H_{13}NO_5)_3H \cdot H_2OCa$        | Trimer + Ca <sup>2+</sup>   |
|                  | 435.15            | $(C_8H_{13}NO_5)_4H \cdot H_2OCa$        | Tetramer + Ca <sup>2+</sup> |
|                  | 447.06            | $(C_8H_{13}NO_5)_2HCa$                   | Dimer + Ca <sup>2+</sup>    |
|                  | 536.69            | $(C_8H_{13}NO_5)_5H \cdot H_2OCa$        | Pentamer + Ca <sup>2+</sup> |
|                  | 638.24            | $(C_8H_{13}NO_5)_6H \cdot H_2OCa$        | Hexamer + Ca <sup>2+</sup>  |

Table S5 Elemental analysis of different chitin samples

| Samples       | C (%) | N (%) | H (%) | S (%)* |
|---------------|-------|-------|-------|--------|
| chitin        | 6.53  | 45.49 | 7.45  | <0.10  |
| chitin-313-48 | 6.45  | 44.72 | 7.46  | 0.41   |

\* In elemental analysis, content of less than 0.1% means that the element is undetectable.

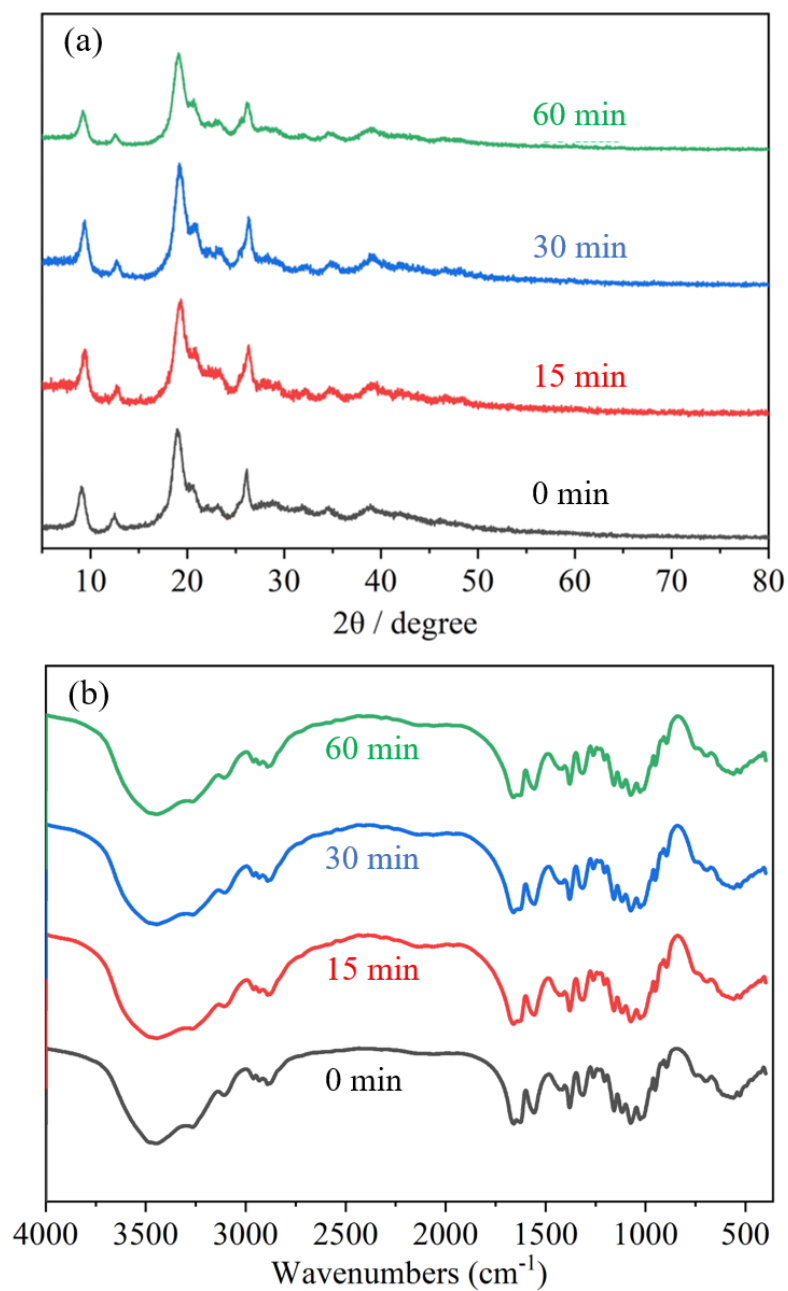

Fig. S9 (a) XRD and FTIR of solid residues after hydrolysis reaction for 0 min, 15 min, 30 min and 60 min. Reaction conditions: 0.2 g acid aged chitin (C/A ratio as 8/1) in 4 mL solvent was heated at 393 K for 1 h.

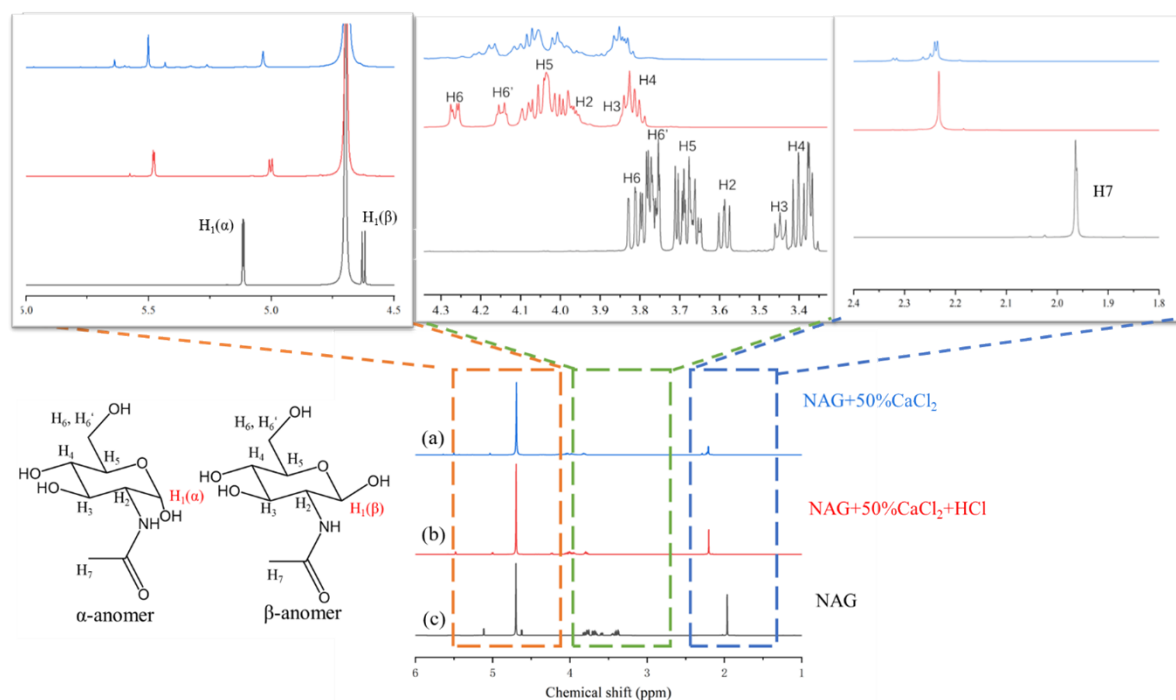

Fig. S10  $^1\text{H}$  NMR of (a) NAG, (b) NAG with HCl (30 mM HCl) and 50%  $\text{CaCl}_2$  and (c) NAG with 50%  $\text{CaCl}_2$ . The solutions were prepared using  $\text{D}_2\text{O}$ .

Table S6 The chemical shift of NAG, NAG- $\text{CaCl}_2$  and NAG- $\text{CaCl}_2$ -HCl in  $^1\text{H}$  NMR.

| H numbers | NAG ppm        | NAG- $\text{CaCl}_2$ ppm | NAG- $\text{CaCl}_2$ -HCl ppm | NAG- $\text{MgCl}_2$ -HCl ppm |
|-----------|----------------|--------------------------|-------------------------------|-------------------------------|
| H1-Alpha  | 5.12-5.11 (d)  | 5.53                     | 5.51                          | 5.21                          |
| H1-Beta   | 4.63-4.62 (d)  | 5.06                     | 5.04-5.03 (d)                 | 4.77-4.76 (d)                 |
| H6        | 3.83-3.79 (m)  | 4.41-4.35 (m)            | 4.28-4.25 (m)                 | 3.93-3.83 (m)                 |
| H6'       | 3.78-3.75 (m)  | 4.21-4.17 (m)            | 4.16-4.14 (m)                 | 3.82-3.79 (m)                 |
| H5        | 3.71--3.65 (m) | 4.12-3.95 (m)            | 4.10-3.98 (m)                 | 3.78-3.72 (m)                 |
| H2        | 3.60-3.58 (m)  | 4.12-3.95 (m)            | 3.97-3.96 (m)                 | 3.71-3.64 (m)                 |
| H3        | 3.46-3.43 (m)  | 3.86-3.83 (m)            | 3.84-3.79 (m)                 | 3.64-3.59 (m)                 |
| H4        | 3.42-3.37 (m)  | 3.86-3.83 (m)            | 3.84-3.79 (m)                 | 3.51-3.45 (m)                 |
| H7        | 1.96 (d)       | 2.24 (d)                 | 2.23                          | 2.07 (m)                      |

Table S7 The chemical shift of NAG, NAG-CaCl<sub>2</sub> and NAG-CaCl<sub>2</sub>-HCl in <sup>13</sup>C NMR.

| Carbon Numbers | NAG ppm | NAG-CaCl <sub>2</sub> ppm | NAG-CaCl <sub>2</sub> -HCl ppm | NAG-MgCl <sub>2</sub> -HCl ppm |
|----------------|---------|---------------------------|--------------------------------|--------------------------------|
| C9             | 174.72  | 176.21                    | 176.10                         | 174.93                         |
| C1             | 174.49  | 175.57                    | 175.50                         | 174.65                         |
| C10            | 94.91   | 94.66                     | 94.62                          | 94.67                          |
| C2             | 90.81   | 91.27                     | 91.22                          | 90.72                          |
| C11            | 75.93   | 74.92                     | 75.01                          | 75.67                          |
| C12            | 73.88   | 73.15                     | 73.24                          | 73.67                          |
| C3             | 71.53   | 71.15                     | 71.17                          | 71.42                          |
| C4             | 70.66   | 70.95                     | 71.00                          | 70.57                          |
| C5             | 70.04   | 70.03(merged)             | 70.01(merged)                  | 69.90                          |
| C13            | 69.81   | 70.03(merged)             | 70.01(merged)                  | 69.71                          |
| C14            | 60.72   | 61.19                     | 61.19                          | 60.70                          |
| C6             | 60.55   | 60.52                     | 60.56                          | 60.56                          |
| C15            | 56.67   | 55.92                     | 56.25                          | 56.55                          |
| C7             | 54.06   | 52.99                     | 53.36                          | 53.96                          |
| C16            | 22.16   | 24.46                     | 24.32                          | 22.44                          |
| C8             | 21.88   | 24.3                      | 24.14                          | 22.19                          |

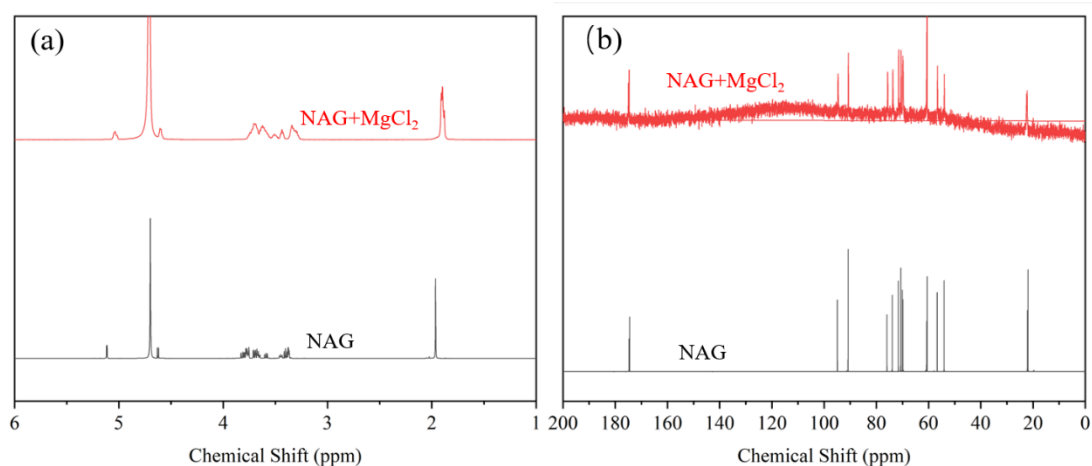

Fig. S11 (a) <sup>1</sup>H and (b) <sup>13</sup>C NMR of NAG and NAG with HCl (30 mM HCl) and 50% MgCl<sub>2</sub>

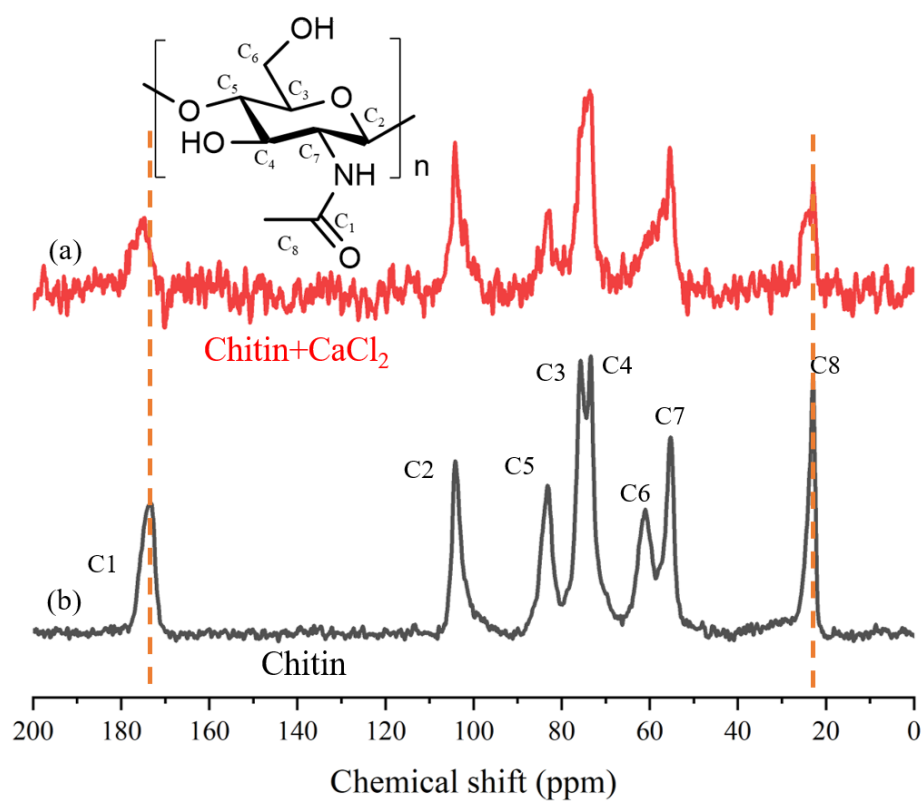

Fig. S12 Solid-state <sup>13</sup>C NMR of (a) Chitin+CaCl<sub>2</sub>, (b) Chitin.

Table S8 The chemical shift of chitin, chitin-CaCl<sub>2</sub> in solid-state <sup>13</sup>C NMR.

| Numbers | Chitin ppm | Chitin-CaCl <sub>2</sub> ppm |
|---------|------------|------------------------------|
| C1      | 173.31     | 175.55                       |
| C2      | 104.30     | 104.30                       |
| C5      | 83.20      | 83.20                        |
| C3      | 75.81      | 74.53(merged)                |
| C4      | 73.47      | 74.53(merged)                |
| C6      | 61.22      | 55.49(merged)                |
| C7      | 55.39      | 55.49(merged)                |
| C8      | 23.05      | 24.18                        |

Table S9 Percentage of chitin and Chitin-CaCl<sub>2</sub> of chemical elements in XPS

| Sample                   | C       |                |             | O       |           | N       |           |
|--------------------------|---------|----------------|-------------|---------|-----------|---------|-----------|
|                          | C=O (%) | C-O-C/C-OH (%) | C-C/C-H (%) | C=O (%) | C-O-C (%) | -NH (%) | NH-Ca (%) |
|                          |         |                |             |         |           |         |           |
| Chitin                   | 18.6    | 50.3           | 31.1        | 92.4    | 7.6       | 100     | -         |
| Chitin-CaCl <sub>2</sub> | 18.3    | 26.9           | 54.9        | 80.3    | 19.7      | 73.9    | 26.1      |

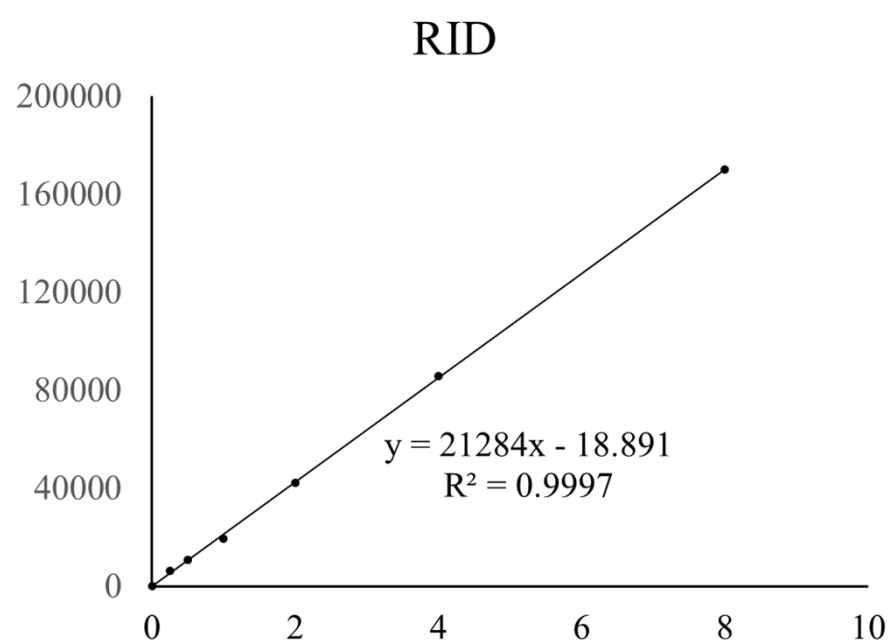

Fig. S13 Calibration curve of NAG detected by RID.

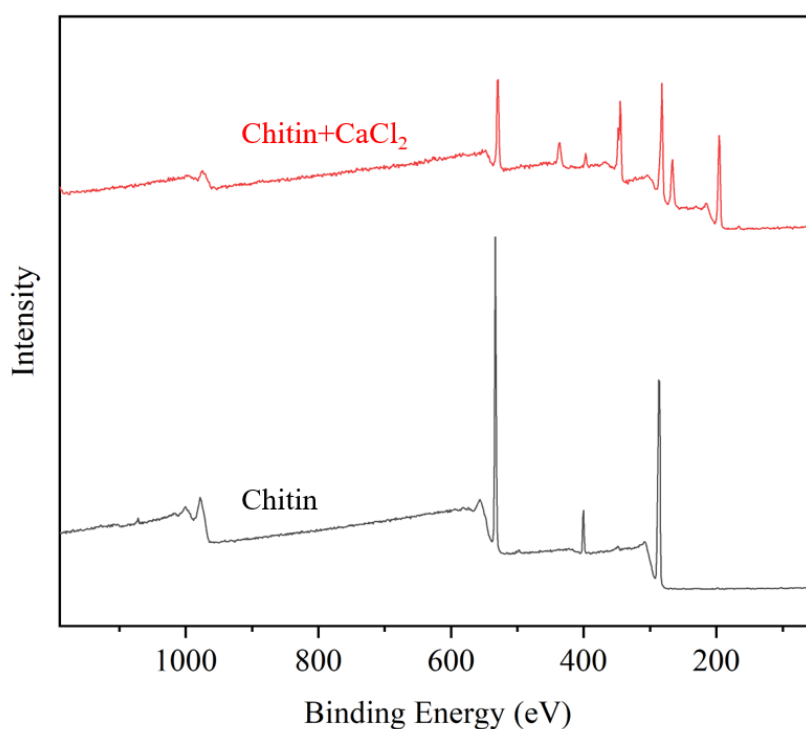

Fig. S14 XPS survey of the chitin and chitin- $\text{CaCl}_2$

### Life cycle Analysis

LCAs were employed to tentatively assess and compare the potential environmental impacts of the as-established aging- hydrolysis (AH-Ca) method with the traditional method by using concentrated acid solutions. A Gate-to-Gate approach was set up and the energy consumption as well as various emissions of mainly the (aging and) hydrolysis stages were evaluated. Fig. S16 shows the boundary of the chitin-to-NAG preparation process. The inventory analysis and environmental impact analysis are provided in the Supporting Information. Based on the analyses, the AH-Ca method emits much less carbon dioxide (about 52% of the traditional method), and the fossil resource consumption index reduces to only 35.5%, which would be more advantageous to mitigate global warming (see Fig. S15). In addition, the fine particle formation index and water consumption index of the AH-Ca method drops to 71.1% and 53.4% as those for the traditional method, indicating the environmental friendliness of the AH-Ca method. Compared to the traditional method, much less  $\text{H}_2\text{SO}_4$  was

engaged in the AH-Ca method. The unit primary energy in  $\text{H}_2\text{SO}_4$  production was 8.2 times higher than that of  $\text{CaCl}_2$ , owing to the additional carbon emissions from process electricity and wastewater treatment during  $\text{H}_2\text{SO}_4$  production. In this regard, although the AH-Ca method employed a higher reaction temperature of 393 K than the traditional method at 323 K, the total primary energy consumption is still lower. To sum up, chitin hydrolysis by the AH-Ca method is more environmentally benign with diminished carbon emissions compared to the traditional method.

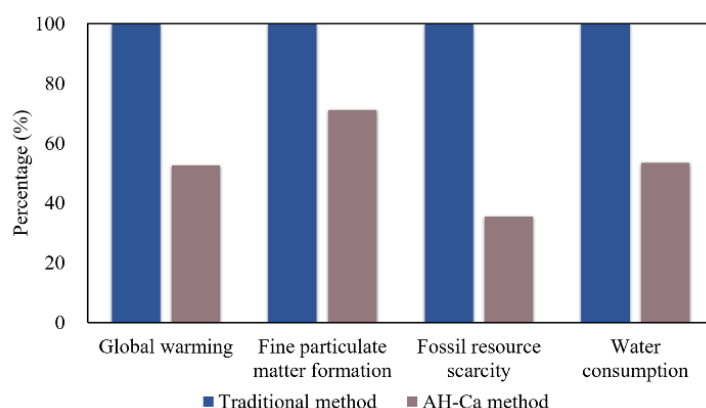

Fig. S15 Comparison of carbon footprint, particulate pollution, energy consumption and water consumption between traditional process and AH-Ca process.

The functional unit for this analysis is defined as 1 kg of chitin consumption, and all inventories assessed are converted to this functional unit. NAG subsequent life cycle stages (e.g., separation, transport, use and disposal of the product) were excluded because this analysis is mainly aimed at comparing different preparation processes. Typically, the analysis approach consists of four phases: (1) definition of objectives and scope, (2) inventory analysis, (3) environmental impact analysis, (4) interpretation of results.

#### 1. Definition of objectives and scope

As shown in Fig. S16, the whole process is divided into 3 main parts. The conventional method uses hydrochloric acid at a concentration of 6.0 M for 5.5 h at 323 K. The NAG yield is 24.1%. The main differences between the two processes are in the treatment and hydrolysis stages.

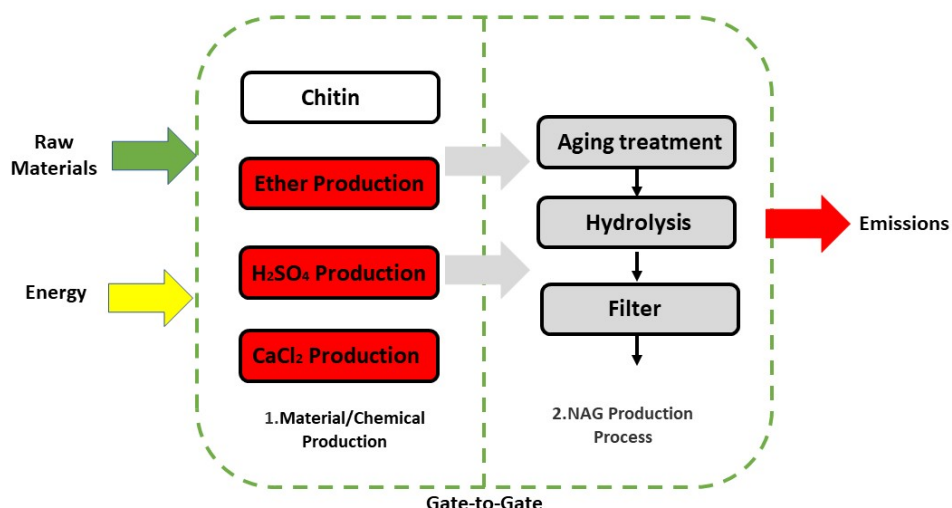

Fig. S16 Boundary of chitin-to-NAG process

## 2. Inventory Analysis

SimaPro is a professional LCA system analysis software and developed by the Center for Environmental Sciences at Leiden University in the Netherlands, and is widely recognized in more than 80 countries worldwide. The software and Environment database versions used in this paper are the latest version of the series, updated in March 2021, and the calculation results have good timeliness.

## 3. Life cycle impact analysis

According to ISO 14044 (2006b), LCIA has four stages: classification, characterization, standardization, and weighting. The following is an introduction to the classification, characterization and calculation methods.

### (1) Classification

Table S10 Classification of Life Cycle Inventory Factors

| Impact type            | Inventory factor categorization                       |
|------------------------|-------------------------------------------------------|
| Global warming         | CO <sub>2</sub>                                       |
| Particle formation     | Particulate matter, SO <sub>2</sub> , NO <sub>x</sub> |
| Fossil energy scarcity | Raw coal, crude oil                                   |
| Water consumption      | Water                                                 |

The product life cycle inventory factors that contribute to the type of impact of the inventory factors according to their physicochemical properties. The product life cycle inventory factors that contribute to their impact types are grouped according to their physicochemical properties, as shown in Table S10.

## (2) Characterization

The environmental impact characterization factors of pollutant emissions covered in this document adopt the ReCiPe2016Midpoint (H) method system, and the corresponding characterization models, type parameters and sources of environmental impact characterization types in the life cycle impact assessment are shown in Table S11.

Table S11 Characterization factor data

| Environmental impact characterization | Unit                       | Parameter Indicator | Characterization Factor | Characterization Factor Unit |
|---------------------------------------|----------------------------|---------------------|-------------------------|------------------------------|
| Global warming                        | kg CO <sub>2</sub> eq      | CO <sub>2</sub>     | 1                       | kg CO <sub>2</sub> eq/kg     |
| Particulate matter                    | kg PM <sub>2.5</sub> eq/kg | Particulate matter  | 1                       | kg PM <sub>2.5</sub> eq      |
|                                       | kg PM <sub>2.5</sub> eq/kg | SO <sub>2</sub>     | 0.29                    | kg PM <sub>2.5</sub> eq/kg   |
|                                       | kg PM <sub>2.5</sub> eq/kg | NO <sub>x</sub>     | 0                       | kg PM <sub>2.5</sub> eq/kg   |
| Fossil energy depletion               | kg oileq                   | Raw coal            | 0.42                    | kg oileq/kg                  |
|                                       | kg oileq                   | Crude oil           | 1                       | kg oileq/kg                  |
| Water consumption                     | m <sup>3</sup>             | Water               | 1                       | m/m <sup>3</sup>             |

## 3) Calculation method

The calculation method uses the basic weighted summation as the following equation.

$$EP_i = \sum EP_{ij} = \sum Q_j \times EF_{ij}$$

Where  $EP_i$  is the  $i$ th impact type characteristic value

$EP_{ij}$  is the contribution of the  $j$ th inventory factor in the  $i$ th impact type

$Q_j$  is the  $j$ th inventory factor emissions

$EF_{ij}$  is the characteristic factor of the  $j$ th inventory factor in the  $i$ th impact type

#### 4. Interpretation of results

Fig. S17 shows the results of the characterization step. All impact scores are displayed using 100% scale. The color indicates different impact types.

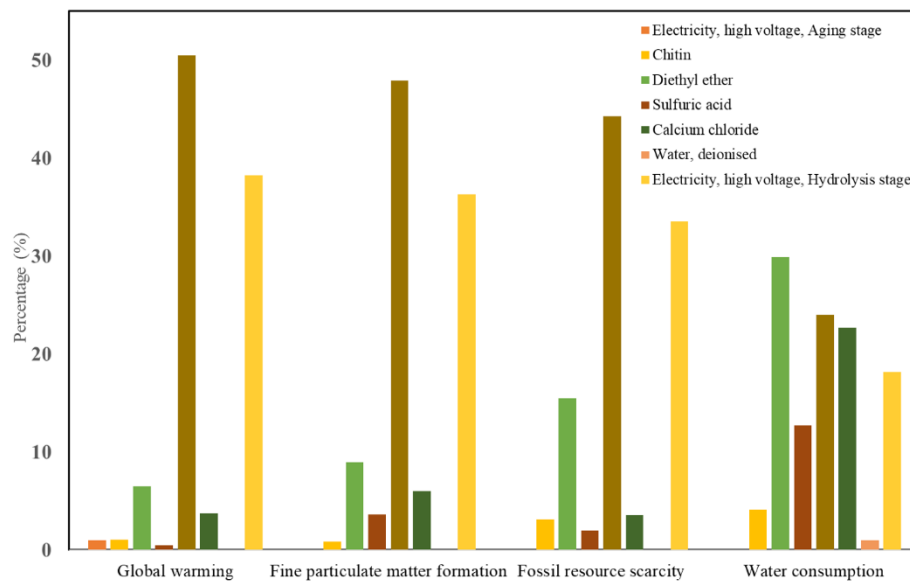

Fig. S17 Proportion of influence factors of different raw materials on AH-Ca method Life cycle analysis

The overall view of the complete life cycle network (showing the whole process) can analyze the whole process of extracting NAG from chitin. The thermometer (red bar on the right) shows the contribution to the environmental load, and the thickness of the line also indicates the total environmental load flow between processes. As shown in Fig. S18, the list of all processes, impact assessment results and process analysis are presented.

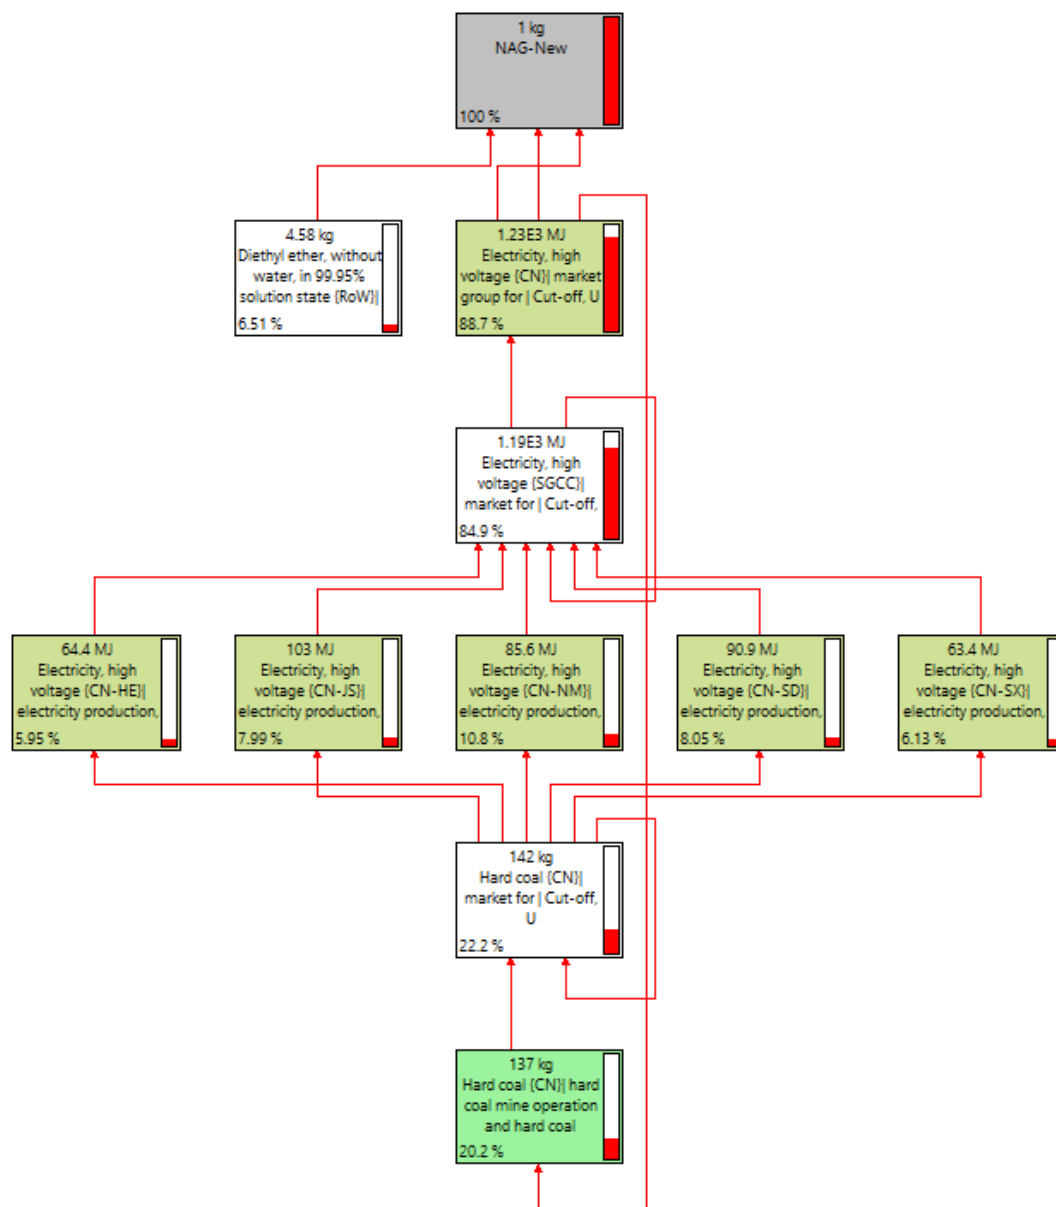

Fig. S18 General view of life cycle network.
